# Supplementary material
Source: publisher site journal article supplement (https://www.dovepress.com/article/339515)
Supplement: Supplementary file 1 [file get_supplementary_file.php]

**Supplementary materials**

**
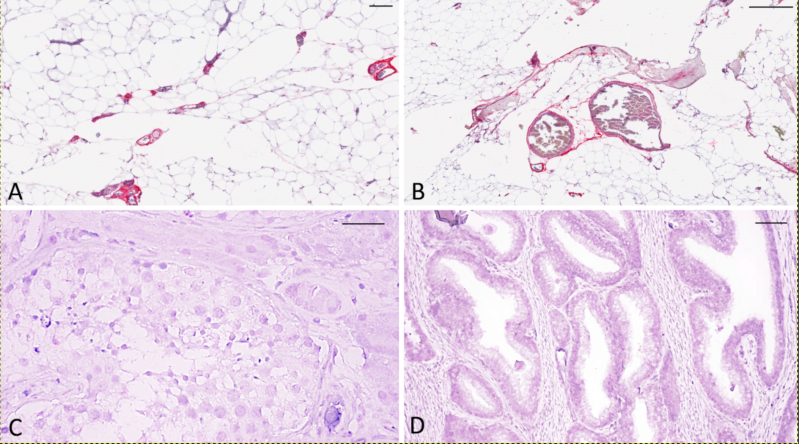
**

**Supplementary Figure 1** (A and B) Immunolocalization of omentin-1/ITLN1 in the omental capillaries (Ultraview Universal Alkaline Phosphatase Red Detection Kit, Ventana). Bars: A: 20 µm; B: 10 µm. (C and D) Testis epithelium and prostate gland treated with anti omentin-1/ITLN1 antibody revealed with Ultraview Universal Alkaline Phosphatase Red Detection Kit (Ventana). In testicular (C) and prostate gland (D) tissues signal is absent. Bars: C: 50 µm; D: 100 µm.


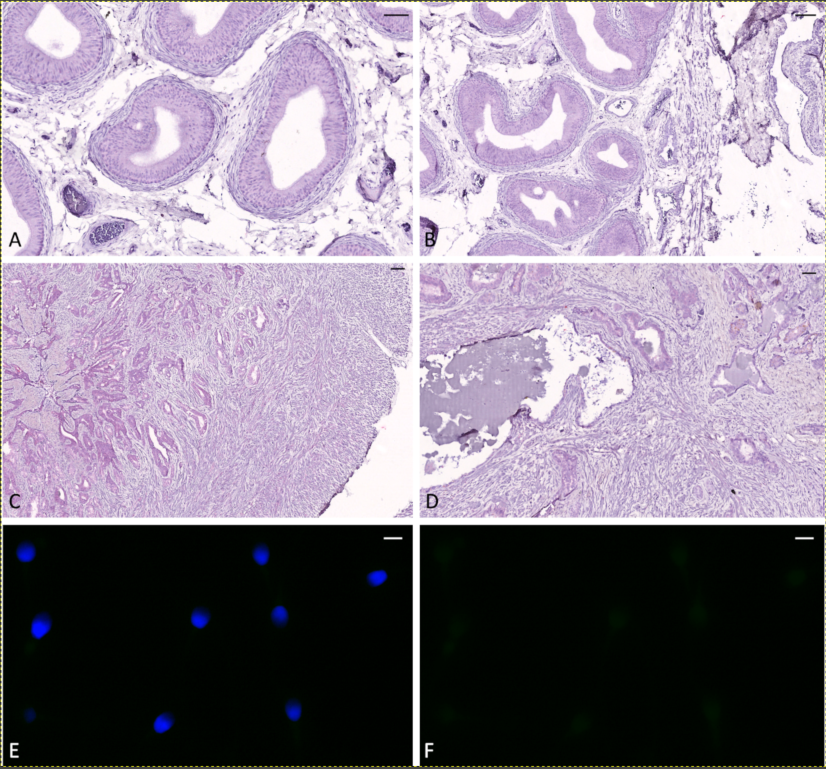


**Supplementary Figure 2** (**A-F**) negative controls for omentin-1/ITLN1 antibody. Epididymis (**A, B**), seminal vesicles (**C, D**) and spermatozoa (**E, F**) treated with the immunocytochemical protocol omitting anti omentin-1/ITLN1 antibody. **E** shows a merged image acquired with DAPI and FITC filters, **F** the same image acquired with FITC filter. Bars: **A, B**: 50 µm; **C**: 300 µm; **D**: 200 µm; **E, F**: 6 µm.
